# Supplementary material for: A Diverse Viral Community from Predatory Wasps in Their Native and Invaded Range, with a New Virus Infectious to Honey Bees
Source: MDPI journal article supplement (doi:10.3390/v13081431), 2021-07-23
Supplement: s1 [file s1]

**Table S1.** Colony site coordinates and date of collection for *V. vulgaris* samples used for total RNA transcriptomes from the native Belgian range and invasive New Zealand range.

| Range                   | Colony | Site             | Coordinates            | Date           |
|-------------------------|--------|------------------|------------------------|----------------|
| Invasive<br>New Zealand | 1      | Six Mile Reserve | S -41.7685; E 172.9572 | March 2014     |
|                         | 2      | Tin Line Reserve | S -41.2809; E 173.5087 | March 2014     |
|                         | 3      | Braeburn Track   | S -41.7954; E 172.5156 | March 2014     |
| Native<br>Belgium       | 4      | Wijgmaal, Leuven | N 50.5539; E 4.4143    | September 2014 |
|                         | 5      | Hasselt, Hasselt | N 50.5523; E 5.2017    | September 2014 |
|                         | 6      | Wezemaal, Leuven | N 50.5720; E 4.4444    | September 2014 |

**Table S2.** Primers used in this study. \*indicates Moku-like virus primers that were used for qPCR.

| Name                                       | Sequence (5'-3')          | Product size (bp) |                  |
|--------------------------------------------|---------------------------|-------------------|------------------|
| <i>Virus primers</i>                       |                           | <i>Sequencing</i> | <i>Screening</i> |
| Moku-like_88F                              | GTAAGTGGCTATCTCTGCTCG     | 1195              |                  |
| Moku-like_1282R                            | GGTAACATCTCAATATACACACCC  |                   |                  |
| Moku-like_1119F                            | GTTGATACGATTGTTAATATTTGGG | 1093              |                  |
| Moku-like_2211R                            | TAATTGGTTCTCTAGTCTTAGTTCC |                   |                  |
| Moku-like_2106F                            | GGAGATGTTAATTGTGATAATCCC  | 1391              | 106              |
| Moku-like_3496R                            | GGAGTCACATACGTCTCTTCC     |                   |                  |
| Moku-like_3218F                            | TGTTGGATGTGCTATTAGTTGG    | 1128              | 279              |
| Moku-like_4345R                            | TTGCCAAAGAGAGTATTCATTCC   |                   |                  |
| Moku-like_4265F                            | CATCCCTGTAGTGTACGC        | 1118              |                  |
| Moku-like_5382R                            | GCCAGTATATCATACATTCTTGG   |                   |                  |
| Moku-like_5299F                            | GGAAGTCACATATAACTCAGC     | 1307              |                  |
| Moku-like_6605R                            | GACTTTATCCAATGTATCACCAC   |                   |                  |
| Moku-like_6511F                            | CAATTCGATCTTATGTTTACTGG   | 1120              |                  |
| Moku-like_7630R                            | GTTAAAGGTTTAGTAAGCATTTCC  |                   |                  |
| Moku-like_7517F                            | GAATGATGATGATGGAAATGCG    | 1290              |                  |
| Moku-like_8806R*                           | CCAGGAATAGCACATTTTCGC     |                   |                  |
| Moku-like_8664F*                           | CGTCTTAAAGGCTTAGCACC      | 1255              | 143              |
| Moku-like_9918R                            | CCGTGTTATAGCCACAACG       |                   |                  |
| Luteo-like_11F                             | GCGTTTCCGTTTCTATATTTTTGTG | 1685              |                  |
| Luteo-like_1695R                           | GACGATTTCTTCTGCTTCTTCG    |                   |                  |
| Luteo-like_1324F                           | GGACCAACTTATTCAGACTGC     | 1790              | 372              |
| Luteo-like_3113R                           | CACCTTTGTTTCACCTCACAC     |                   |                  |
| Luteo-like_2364F                           | AAGAGTTGGCTGGTCCCCTT      | 483               |                  |
| Luteo-like_2846R                           | CCCTTGAAGAGCATACCGGC      |                   |                  |
| <i>Reference gene primers for qPCR [1]</i> |                           |                   |                  |
| Ndufa8_Apis_F                              | GCACGATTACCAAGACCAA       |                   | 78               |
| Ndufa8_Apis_R                              | GGTGGAGCTACAGGCTCAGG      |                   |                  |
| Pros54_Apis_F                              | TCGAACCAAGATGGTACTGGAA    |                   | 100              |
| Pros54_Apis_R                              | TTGTTGTGCTTGCAGTCGTG      |                   |                  |

**Table S3.** Total number of viruses present, and number of virus-like contigs assembled *de novo* from each transcriptome. The percentage of RNA-seq reads aligning to virus in each sample is indicated. (Colonies from Nelson, New Zealand (1-3) and Leuven, Belgium (4-6)).

|                             | Larvae |      |      |     |      |      | Workers |      |      |      |      |      | Gynes |      |      |      |      |      |
|-----------------------------|--------|------|------|-----|------|------|---------|------|------|------|------|------|-------|------|------|------|------|------|
|                             | 1      | 2    | 3    | 4   | 5    | 6    | 1       | 2    | 3    | 4    | 5    | 6    | 1     | 2    | 3    | 4    | 5    | 6    |
| Total viruses present       | 7      | 11   | 4    | 7   | 21   | 31   | 9       | 5    | 4    | 7    | 5    | 4    | 1     | 2    | 1    | 1    | 3    | 1    |
| # virus-like >200 bp        | 105    | 243  | 54   | 102 | 337  | 403  | 45      | 9    | 16   | 90   | 114  | 71   | 2     | 3    | 1    | 1    | 5    | 2    |
| contigs >1000 bp            | 15     | 48   | 8    | 12  | 50   | 69   | 13      | 5    | 8    | 23   | 15   | 8    | 2     | 2    | 1    | 1    | 3    | 1    |
| % of reads aligned to virus | 0.27   | 0.15 | 0.08 | 0.6 | 0.75 | 0.76 | 0.21    | 0.43 | 0.05 | 0.99 | 0.49 | 0.27 | 0.04  | 0.22 | 0.05 | 0.13 | 0.15 | 0.17 |



**Table S5:** Average fold coverage and percentage of RNA reads aligning to *Vespula vulgaris* Luteo-like virus 1 and *Vespula vulgaris* Moku-like virus. (Colonies from Nelson, New Zealand (1-3) and Leuven, Belgium (4-6)).

|                         |               | Larvae |      |      |      |      |      | Workers |      |      |      |      |      | Gynes |      |      |      |      |      |
|-------------------------|---------------|--------|------|------|------|------|------|---------|------|------|------|------|------|-------|------|------|------|------|------|
|                         |               | 1      | 2    | 3    | 4    | 5    | 6    | 1       | 2    | 3    | 4    | 5    | 6    | 1     | 2    | 3    | 4    | 5    | 6    |
| <i>Luteo-like virus</i> | Fold coverage | 1630   | 286  | 841  | 5030 | 46   | 7378 | 969     | 974  | 827  | 2964 | 2391 | 4006 | 480   | 519  | 550  | 1923 | 1026 | 2446 |
|                         | % reads       | 0.12   | 0.02 | 0.08 | 0.34 | 0.01 | 0.43 | 0.06    | 0.07 | 0.04 | 0.15 | 0.22 | 0.23 | 0.04  | 0.04 | 0.05 | 0.02 | 0.06 | 0.17 |
| <i>Moku-like virus</i>  | Fold coverage |        |      |      |      | 770  | 30   |         |      |      |      | 119  |      |       |      |      |      | 537  |      |
|                         | % reads       |        |      |      |      | 0.09 | 0.01 |         |      |      |      | 0.04 |      |       |      |      |      | 0.10 |      |



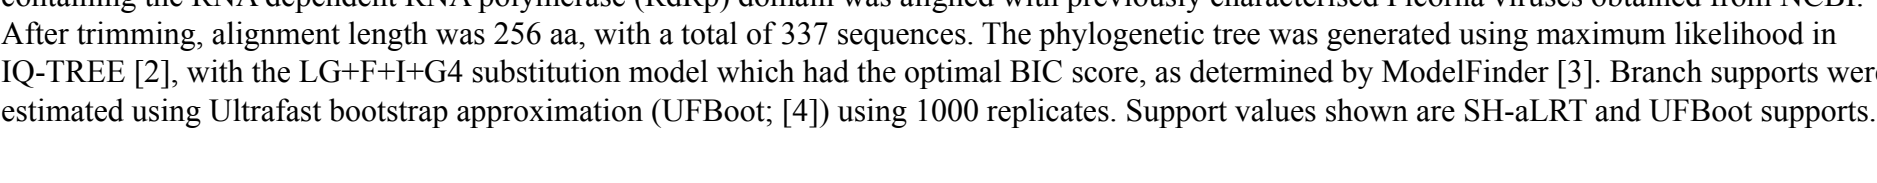





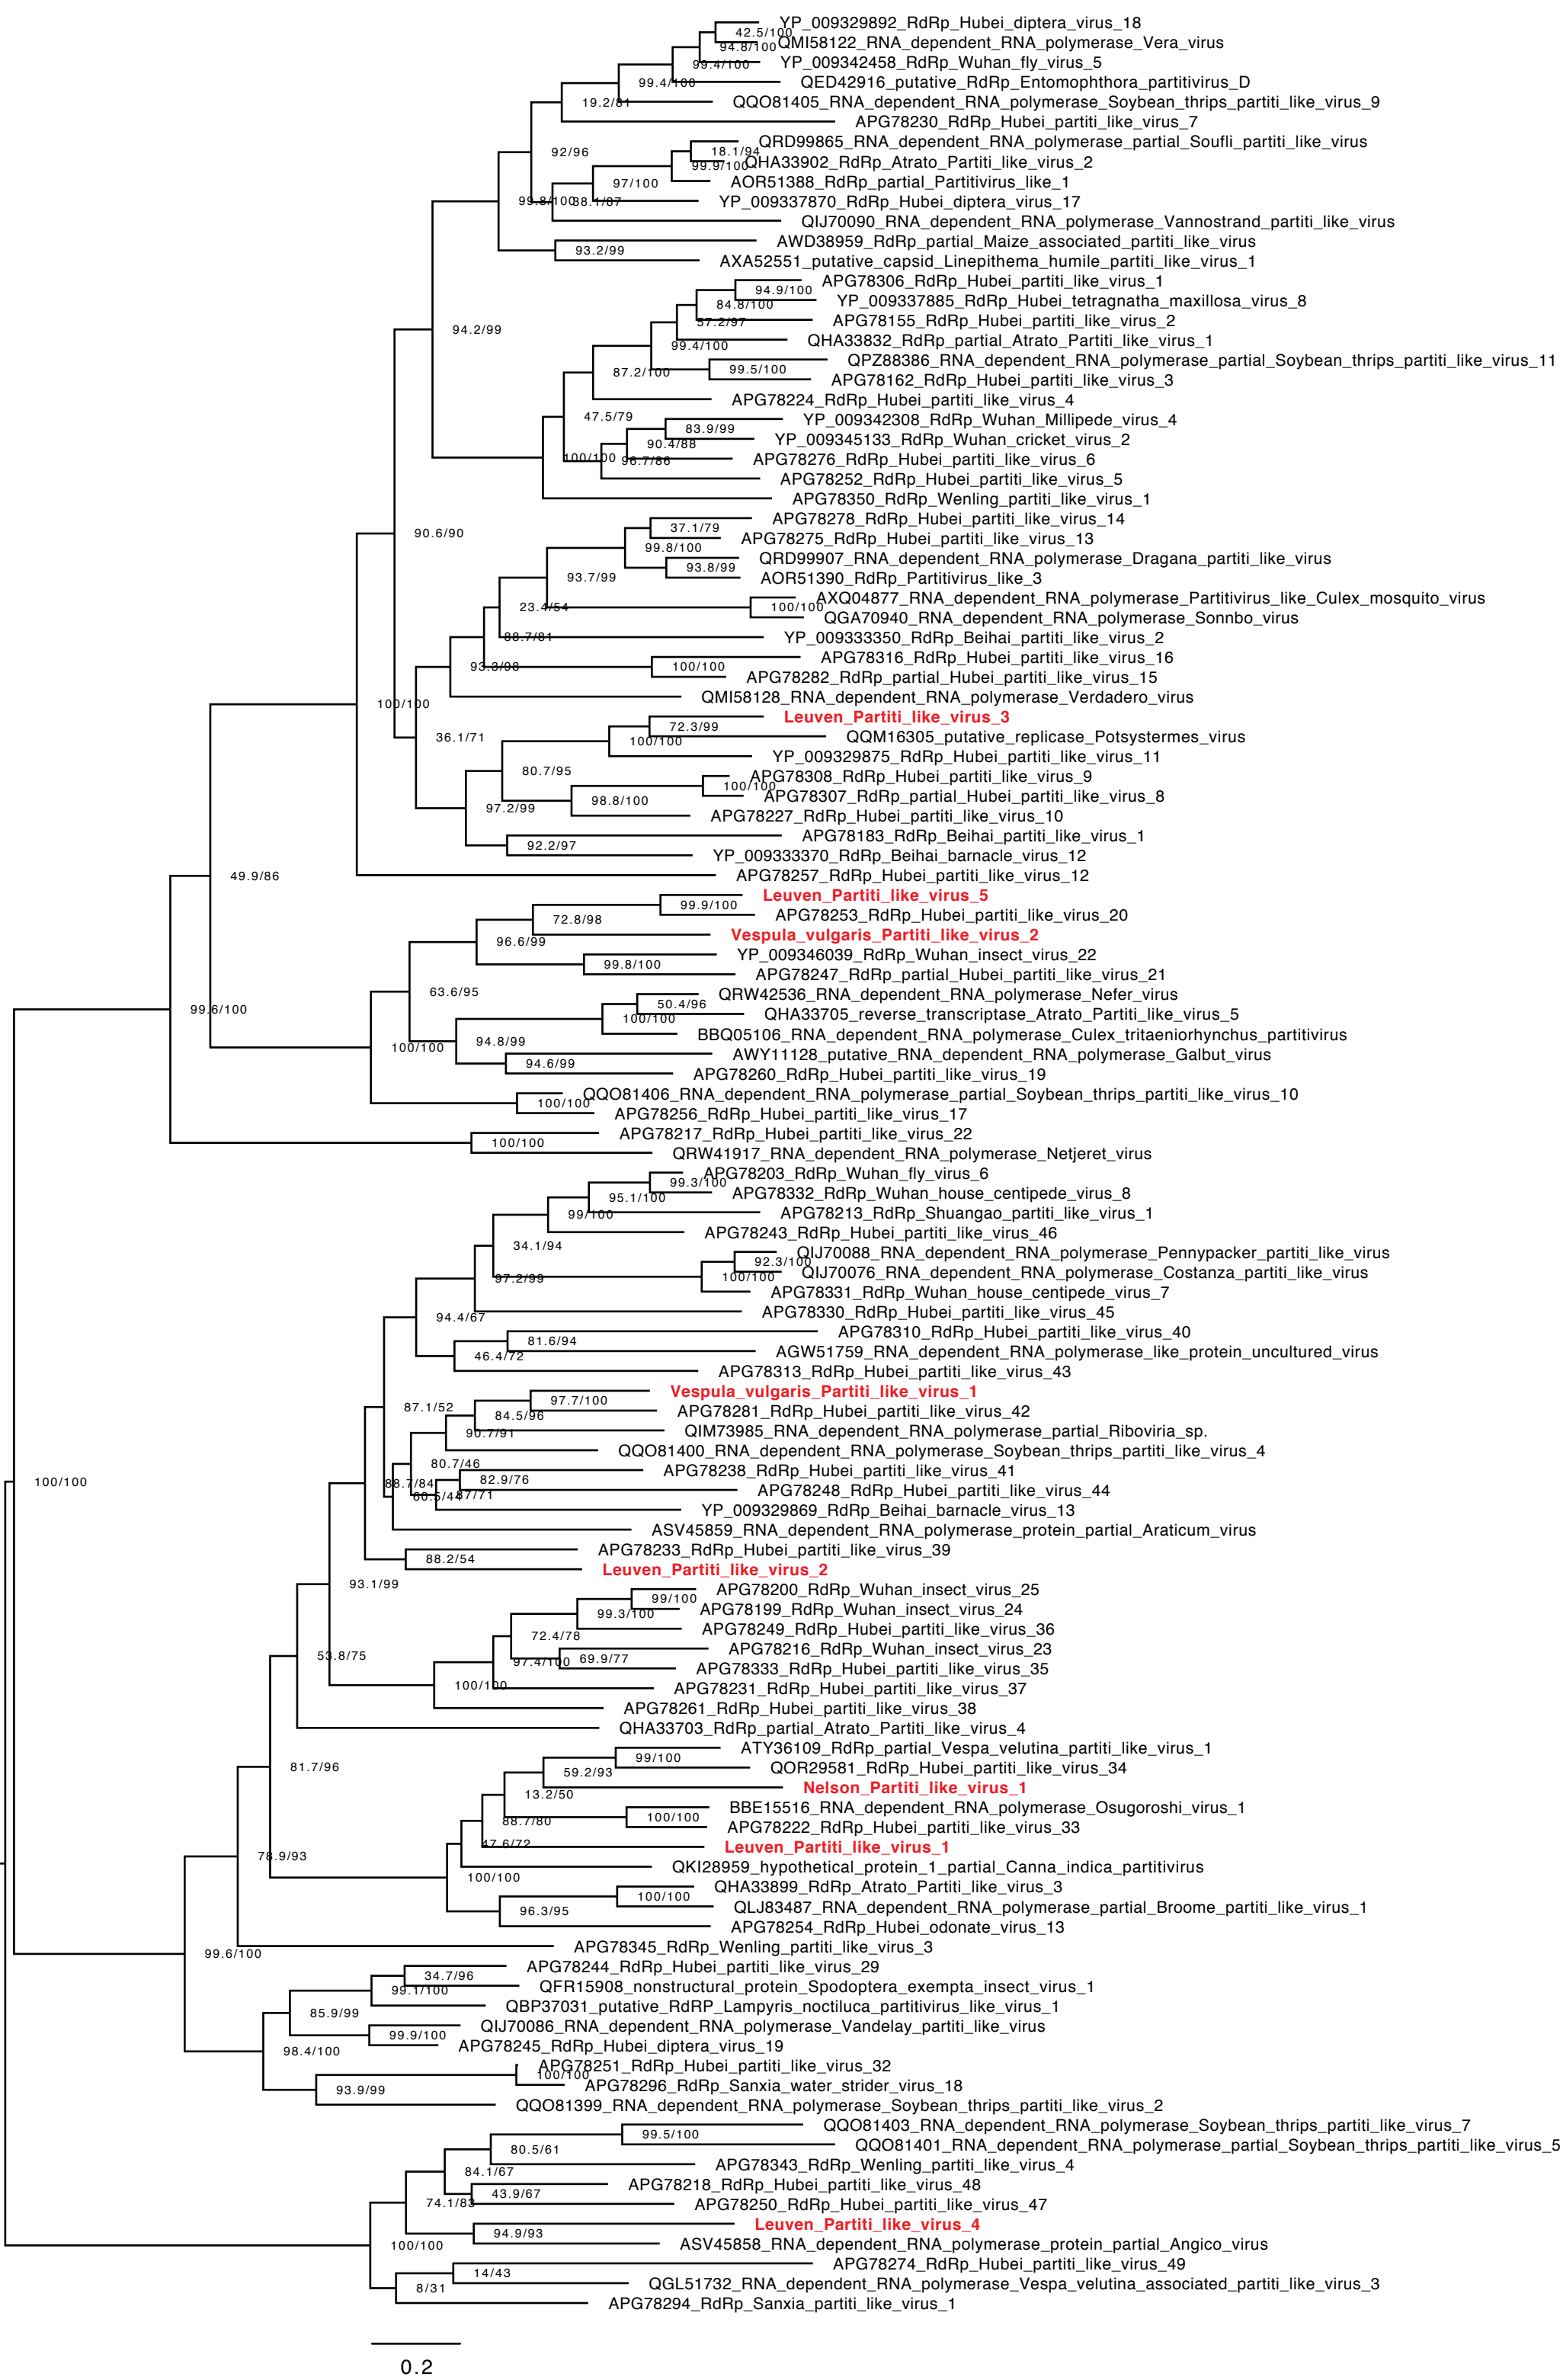

**Figure S3. Detailed Partiti phylogenetic tree from Figure 1.** Phylogenetic tree of the novel Partiti viruses identified in *Vesputula vulgaris*. Novel viruses are shown in red. The open reading frame containing the RNA dependent RNA polymerase (RdRp) domain was aligned with previously characterised Partiti viruses obtained from NCBI. After trimming, alignment length was 405 aa, with a total of 116 sequences. The phylogenetic tree was generated using maximum likelihood in IQ-TREE [2], with the LG+F+I+G4 substitution model which had the optimal BIC score, as determined by ModelFinder [3]. Branch supports were estimated using Ultrafast bootstrap approximation (UFBoot; [4]) using 1000 replicates. Support values shown are SH-aLRT and UFBoot supports.



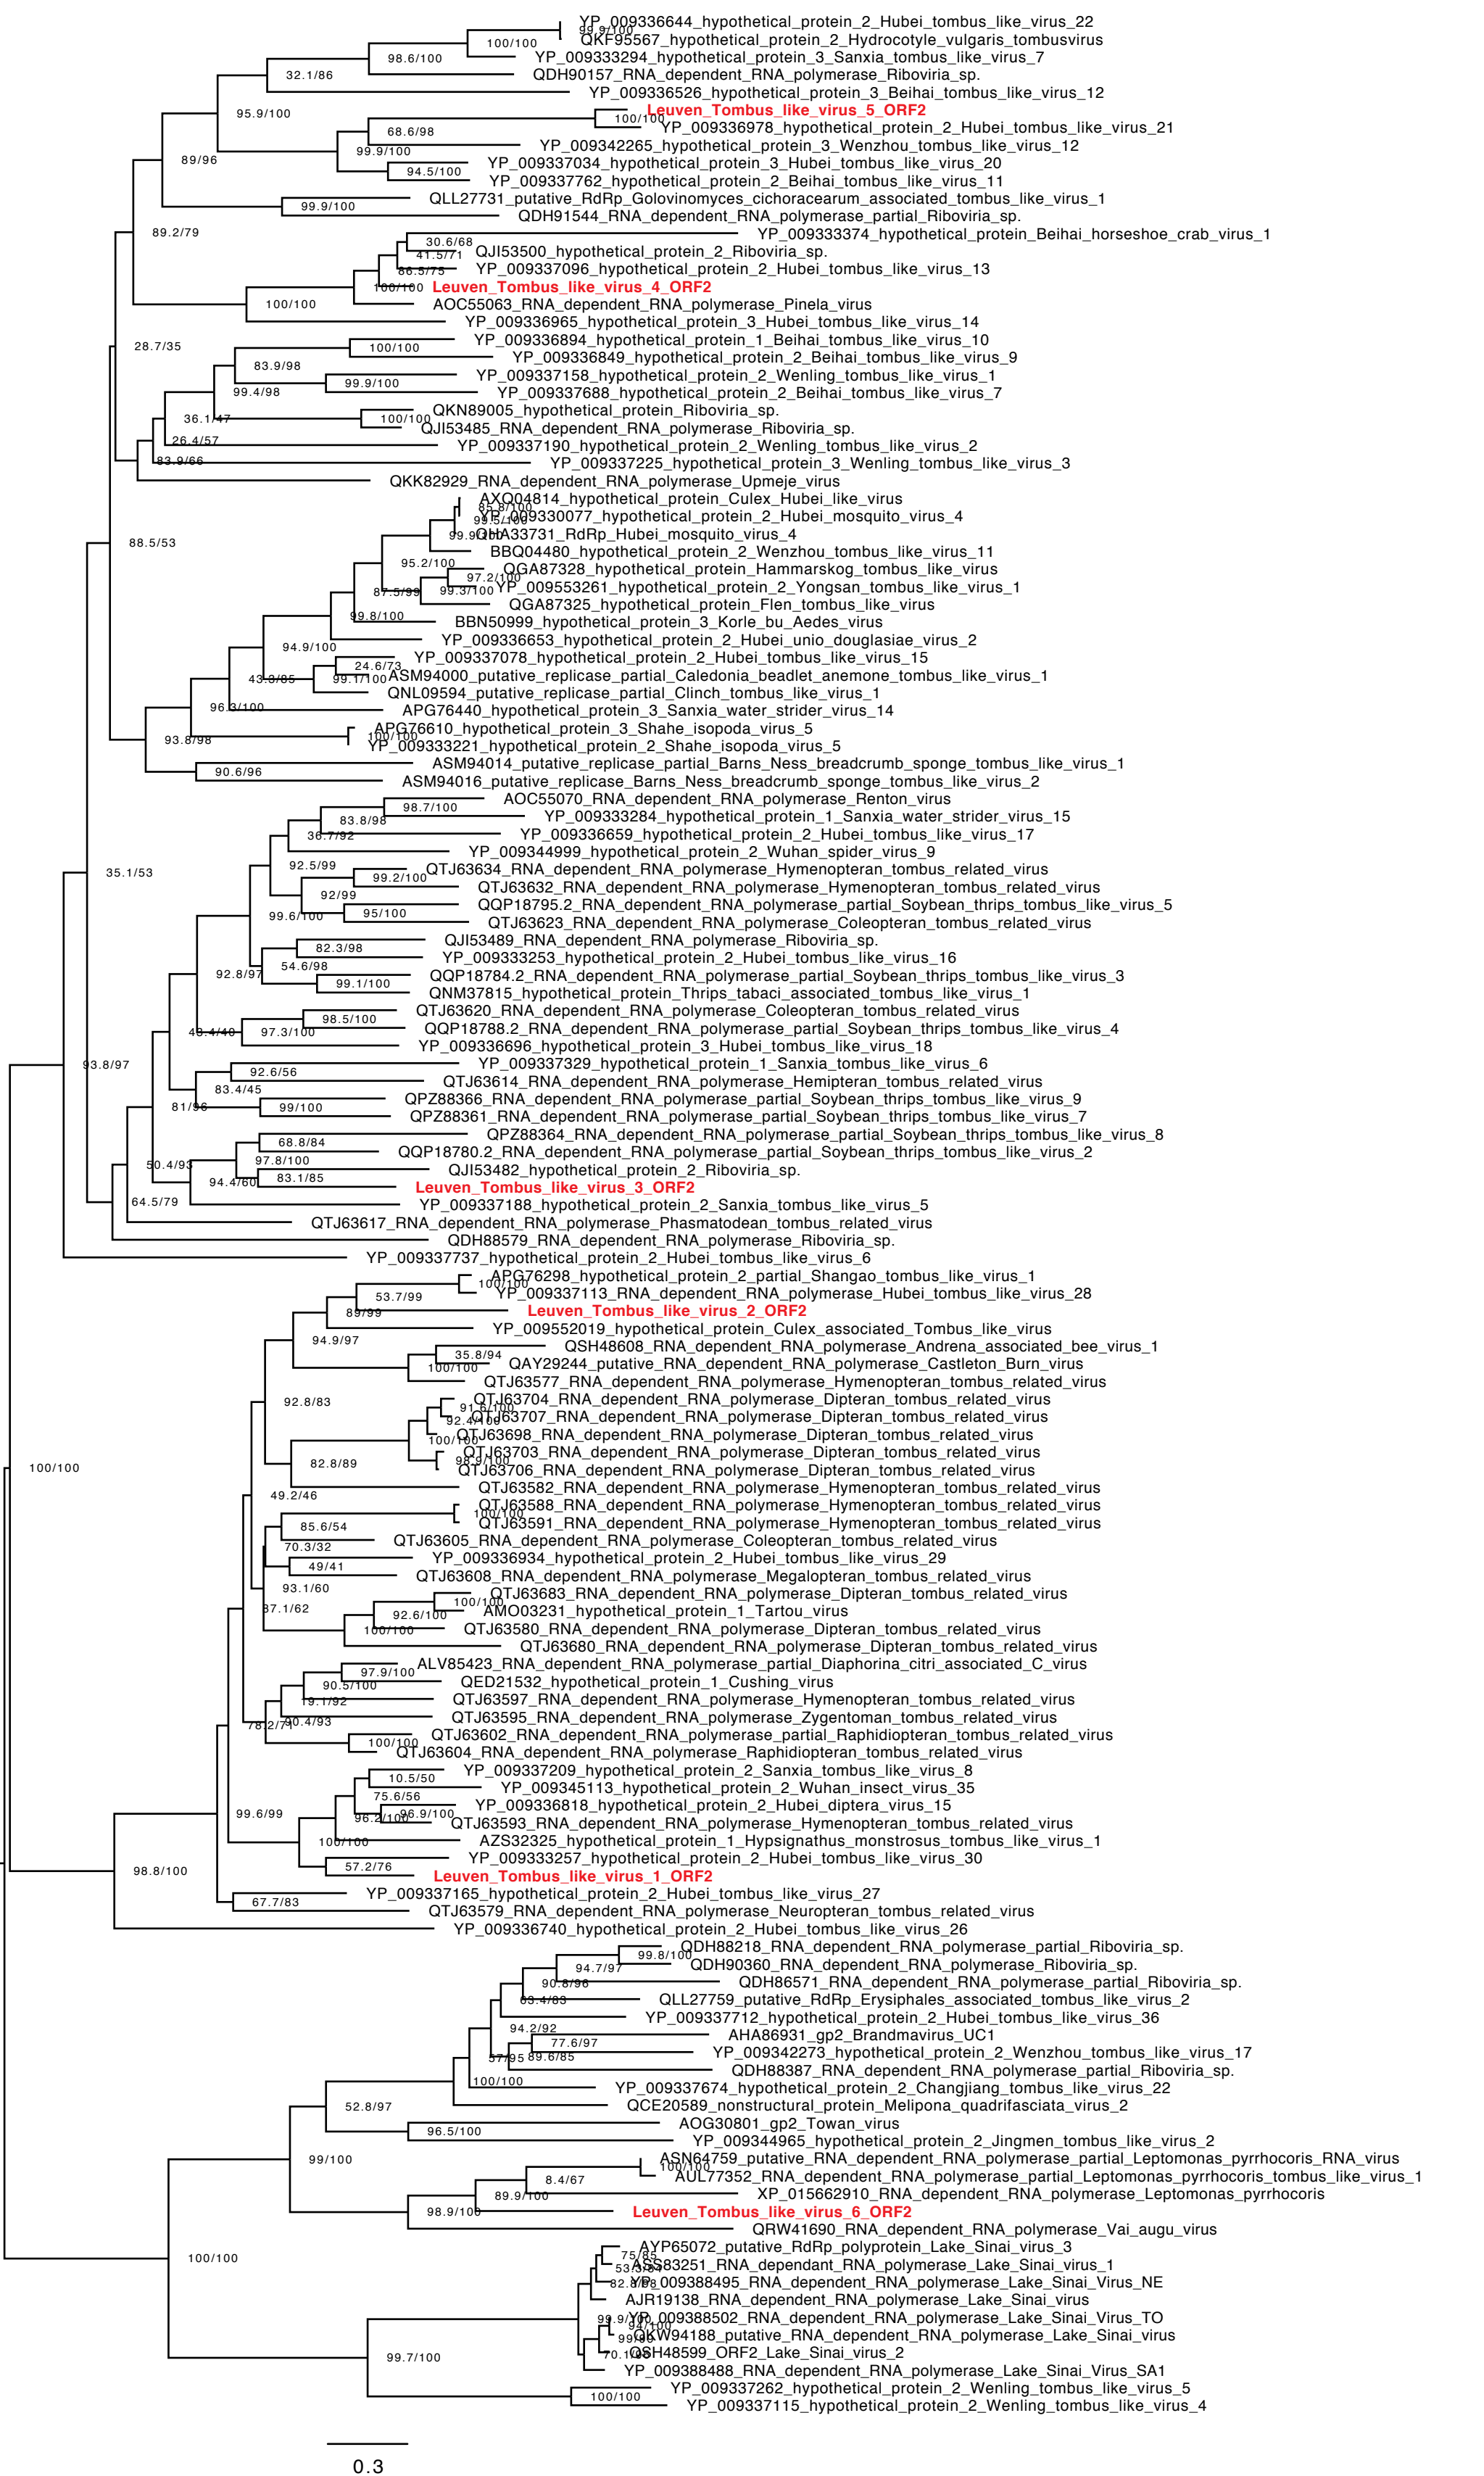

**Figure S4. Detailed Tombus phylogenetic tree from Figure 1.** Phylogenetic tree of the novel Tombus viruses identified in *Vespula vulgaris*. Novel viruses are shown in red. The open reading frame containing the RNA dependent RNA polymerase (RdRp) domain was aligned with previously characterised Partiti viruses obtained from NCBI. After trimming, alignment length was 344 aa, with a total of 136 sequences. The phylogenetic tree was generated using maximum likelihood in IQ-TREE [2], with the rtREV+F+I+G4 substitution model which had the optimal BIC score, as determined by ModelFinder [3]. Branch supports were estimated using Ultrafast bootstrap approximation (UFBoot; [4]) using 1000 replicates. Support values shown are SH-aLRT and UFBoot supports.



## Supplementary references

1. Cameron, R.C.; Duncan, E.J.; Dearden, P.K. Stable reference genes for the measurement of transcript abundance during larval caste development in the honeybee. *Apidologie* **2013**, *44*, 357-366.
2. Nguyen, L.-T.; Schmidt, H.A.; von Haeseler, A.; Minh, B.Q. Iq-tree: A fast and effective stochastic algorithm for estimating maximum-likelihood phylogenies. *Mol Biol Evol* **2014**, *32*, 268-274.
3. Kalyaanamoorthy, S.; Minh, B.Q.; Wong, T.K.F.; von Haeseler, A.; Jermiin, L.S. Modelfinder: Fast model selection for accurate phylogenetic estimates. *Nat Methods* **2017**, *14*.
4. Hoang, D.T.; Chernomor, O.; von Haeseler, A.; Minh, B.Q.; Vinh, L.S. Ufboot2: Improving the ultrafast bootstrap approximation. *Mol Biol Evol* **2017**, *35*, 518-522.
